# Supplementary material
Source: PubMed Central journal article supplement (PMC7610584)
Supplement: EMS120889-supplement-Appendix.pdf [file EMS120889-supplement-Appendix.pdf]

**Table A.1.** Observed line parameters for CH<sub>2</sub>CCHCCH in TMC-1.

| $JK_aK_c$                             | $\nu_{obs}^a$<br>(MHz) | $\int T_A^* dv^b$<br>(mK km s <sup>-1</sup> ) | $\Delta v^c$<br>(km s <sup>-1</sup> ) | $T_A^*$<br>(mK)      |
|---------------------------------------|------------------------|-----------------------------------------------|---------------------------------------|----------------------|
| 7 <sub>1,7</sub> – 6 <sub>1,6</sub>   | 34472.262(10)          | 2.4±0.4                                       | 0.60±0.05                             | 3.7±0.3 <sup>d</sup> |
| 7 <sub>0,7</sub> – 6 <sub>0,6</sub>   | 35126.923(10)          | 4.0±0.5                                       | 0.77±0.05                             | 4.8±0.3              |
| 7 <sub>2,6</sub> – 6 <sub>2,5</sub>   | 35195.532(10)          | 1.6±0.4                                       | 0.63±0.07                             | 2.4±0.3              |
| 7 <sub>3,5</sub> – 6 <sub>3,4</sub>   | 35222.531(10)          | 1.0±0.4                                       | 0.70±0.20                             | 1.3±0.3              |
| 7 <sub>3,4</sub> – 6 <sub>3,3</sub>   | 35223.195(10)          | 0.7±0.3                                       | 0.60±0.17                             | 1.0±0.3              |
| 7 <sub>2,5</sub> – 6 <sub>2,4</sub>   | 35269.664(10)          | 2.2±0.5                                       | 0.74±0.08                             | 2.7±0.3              |
| 7 <sub>1,6</sub> – 6 <sub>1,5</sub>   | 35897.418(10)          | 3.6±0.5                                       | 0.73±0.05                             | 4.7±0.3              |
| 8 <sub>1,8</sub> – 7 <sub>1,7</sub>   | 39390.116(10)          | 4.3±0.4                                       | 0.77±0.04                             | 5.3±0.3              |
| 8 <sub>0,8</sub> – 7 <sub>0,7</sub>   | 40118.252(10)          | 4.7±0.4                                       | 0.72±0.05                             | 6.1±0.3              |
| 8 <sub>2,7</sub> – 7 <sub>2,6</sub>   | 40218.511(20)          | 0.8±0.4                                       | 0.50±0.20                             | 1.6±0.3 <sup>e</sup> |
| 8 <sub>2,6</sub> – 7 <sub>2,5</sub>   | 40329.448(10)          | 2.6±0.6                                       | 0.75±0.09                             | 3.2±0.4              |
| 8 <sub>1,7</sub> – 7 <sub>1,6</sub>   | 41018.002(10)          | 2.7±0.5                                       | 0.55±0.06                             | 4.6±0.4              |
| 9 <sub>1,9</sub> – 8 <sub>1,8</sub>   | 44305.369(10)          | 2.8±0.5                                       | 0.61±0.07                             | 4.3±0.5              |
| 9 <sub>0,9</sub> – 8 <sub>0,8</sub>   | 45099.094(20)          | 4.4±1.0                                       | 0.57±0.02                             | 8.0±2.0 <sup>f</sup> |
| 9 <sub>2,8</sub> – 8 <sub>2,7</sub>   | 45239.452(10)          | 3.2±0.8                                       | 0.73±0.10                             | 4.1±0.6              |
| 9 <sub>3,7</sub> – 8 <sub>3,6</sub>   | 45291.918(10)          |                                               |                                       | <sup>g</sup>         |
| 9 <sub>3,6</sub> – 8 <sub>3,5</sub>   | 45294.382(20)          | 1.3±0.5                                       | 0.69±0.17                             | 1.9±0.5              |
| 9 <sub>2,7</sub> – 8 <sub>2,6</sub>   | 45397.522(20)          | 1.5±0.5                                       | 0.52±0.15                             | 1.8±0.6 <sup>h</sup> |
| 9 <sub>1,8</sub> – 8 <sub>1,7</sub>   | 46135.431(10)          | 2.3±0.5                                       | 0.60±0.07                             | 4.7±0.6              |
| 10 <sub>1,10</sub> – 9 <sub>1,9</sub> | 49217.784(10)          | 3.2±0.7                                       | 0.65±0.10                             | 4.9±0.6              |

**Notes.**

- (<sup>a</sup>) Observed frequency assuming a  $v_{LSR}$  of 5.83 km s<sup>-1</sup>.  
(<sup>b</sup>) Integrated line intensity in mK km s<sup>-1</sup>.  
(<sup>c</sup>) Linewidth at half intensity derived by fitting a Gaussian function to the observed line profile (in km s<sup>-1</sup>).  
(<sup>d</sup>) Blended with a negative feature produced in the folding of the frequency switching observing procedure.  
(<sup>e</sup>) Blended with two negative features produced in the frequency switching folding. The intensity is uncertain  
(<sup>f</sup>) Heavily blended with HCCCH<sub>2</sub>CN. Frequency difference between both lines lower than 20 kHz. We estimate that the contribution of this contaminating feature, by comparison with other similar lines of this species, is ~50%  
(<sup>g</sup>) Fully blended with a negative feature produced in the frequency switching folding. The fit is unreliable.  
(<sup>h</sup>) Blended with two lines from other species. The separation between them still allows for a reasonable fit to the line parameters.

**Appendix A: Line parameters of H<sub>2</sub>CCHCCH and CH<sub>3</sub>C<sub>4</sub>H**

Line parameters for the different molecules studied in this work were obtained by fitting a Gaussian line profile to the observed data. A window of  $\pm 20$  km s<sup>-1</sup> around the  $v_{LSR}$  of the source was considered for each transition. The derived line parameters for H<sub>2</sub>CCCHCCH are given in Table A.1. Those of CH<sub>3</sub>C<sub>4</sub>H are provided in Table A.2.

**Appendix B: Observed and calculated frequencies for H<sub>2</sub>CCHCCH**

In this section, we provide the full list of observed and calculated frequencies for allyl cyanide. The laboratory data come from McCarthy et al. (2020). All lines were weighted in the fit as  $1/\sigma^2$ . Laboratory data have an accuracy of 2 kHz, while the corresponding uncertainty for the rotational transitions measured in TMC-1 is 10 kHz, with the exception of four lines showing some partial blending with other features for which we assigned an uncertainty of 20 kHz.

**Table A.2.** Observed line parameters for CH<sub>3</sub>C<sub>4</sub>H in TMC-1.

| $J_u$ | $K$ | $\nu$<br>(MHz) | $\int T_A^* dv^a$<br>(mK km s <sup>-1</sup> ) | $v_{LSR}^b$<br>(km s <sup>-1</sup> ) | $\Delta v^c$<br>(km s <sup>-1</sup> ) | $T_A^*$ <sup>d</sup><br>(mK) |
|-------|-----|----------------|-----------------------------------------------|--------------------------------------|---------------------------------------|------------------------------|
| 8     | 2   | 32570.504      | 2.1 ± 0.5                                     | 5.80 ± 0.05                          | 0.82 ± 0.11                           | 2.4 ± 0.3                    |
| 8     | 1   | 32571.457      | 30.8 ± 0.7                                    | 5.80 ± 0.02                          | 0.74 ± 0.01                           | 39.3 ± 0.3                   |
| 8     | 0   | 32571.775      | 33.6 ± 0.7                                    | 5.80 ± 0.02                          | 0.73 ± 0.01                           | 42.8 ± 0.3                   |
| 9     | 2   | 36641.764      | 2.8 ± 0.5                                     | 5.81 ± 0.03                          | 0.79 ± 0.07                           | 3.4 ± 0.3                    |
| 9     | 1   | 36642.836      | 32.0 ± 0.7                                    | 5.79 ± 0.04                          | 0.69 ± 0.01                           | 43.8 ± 0.3                   |
| 9     | 0   | 36643.194      | 33.9 ± 0.7                                    | 5.80 ± 0.02                          | 0.69 ± 0.01                           | 46.3 ± 0.3                   |
| 10    | 2   | 40713.005      | 2.0 ± 0.5                                     | 5.78 ± 0.03                          | 0.47 ± 0.08                           | 3.9 ± 0.4                    |
| 10    | 1   | 40714.197      | 31.9 ± 0.7                                    | 5.81 ± 0.02                          | 0.57 ± 0.01                           | 53.0 ± 0.4                   |
| 10    | 0   | 40714.594      | 34.2 ± 0.7                                    | 5.80 ± 0.02                          | 0.58 ± 0.01                           | 55.2 ± 0.4                   |
| 11    | 2   | 44784.226      | 2.2 ± 0.7                                     | 5.89 ± 0.05                          | 0.61 ± 0.10                           | 3.4 ± 0.5                    |
| 11    | 1   | 44785.536      | 30.0 ± 0.8                                    | 5.79 ± 0.02                          | 0.63 ± 0.01                           | 44.5 ± 0.5                   |
| 11    | 0   | 44785.973      | 30.9 ± 0.8                                    | 5.80 ± 0.02                          | 0.60 ± 0.02                           | 48.6 ± 0.5                   |
| 12    | 2   | 48855.424      | 1.9 ± 0.6                                     | 5.85 ± 0.04                          | 0.44 ± 0.07                           | 4.1 ± 0.6                    |
| 12    | 1   | 48856.853      | 23.8 ± 0.8                                    | 5.80 ± 0.02                          | 0.57 ± 0.01                           | 39.1 ± 0.6                   |
| 12    | 0   | 48857.330      | 27.1 ± 0.8                                    | 5.80 ± 0.02                          | 0.58 ± 0.01                           | 44.2 ± 0.6                   |

**Notes.** (<sup>a</sup>) Observed frequency assuming a  $v_{LSR}$  of 5.83 km s<sup>-1</sup>.

(<sup>b</sup>) Local standard of rest velocity of the line in km s<sup>-1</sup>.

(<sup>c</sup>) Integrated line intensity in mK km s<sup>-1</sup>.

(<sup>d</sup>) Linewidth at half intensity derived by fitting a Gaussian function to the observed line profile (in km s<sup>-1</sup>).

**Table B.1.** Observed frequencies for H<sub>2</sub>CCCHCCH in the laboratory and in TMC-1.

| Transition                            | $\nu$<br>(MHz) | Unc.<br>(MHz) | $\nu_{cal}$<br>(MHz) | Unc.<br>(MHz) | $\nu(obs - cal)$<br>(MHz) |   |
|---------------------------------------|----------------|---------------|----------------------|---------------|---------------------------|---|
| 2 <sub>1,2</sub> – 1 <sub>1,1</sub>   | 9854.409       | 0.002         | 9854.4102            | 0.0004        | -0.0012                   | A |
| 2 <sub>0,2</sub> – 1 <sub>0,1</sub>   | 10056.532      | 0.002         | 10056.5335           | 0.0003        | -0.0015                   | A |
| 2 <sub>1,1</sub> – 1 <sub>1,0</sub>   | 10261.996      | 0.002         | 10261.9977           | 0.0005        | -0.0017                   | A |
| 3 <sub>1,3</sub> – 2 <sub>1,2</sub>   | 14780.736      | 0.002         | 14780.7355           | 0.0006        | 0.0005                    | A |
| 3 <sub>0,3</sub> – 2 <sub>0,2</sub>   | 15081.411      | 0.002         | 15081.4106           | 0.0004        | 0.0004                    | A |
| 3 <sub>2,2</sub> – 2 <sub>2,1</sub>   | 15088.775      | 0.002         | 15088.7753           | 0.0005        | -0.0003                   | A |
| 3 <sub>1,2</sub> – 2 <sub>1,1</sub>   | 15392.077      | 0.002         | 15392.0770           | 0.0007        | 0.0000                    | A |
| 4 <sub>1,4</sub> – 3 <sub>1,3</sub>   | 19706.013      | 0.002         | 19706.0129           | 0.0007        | 0.0001                    | A |
| 4 <sub>0,4</sub> – 3 <sub>0,3</sub>   | 20102.224      | 0.002         | 20102.2239           | 0.0006        | 0.0001                    | A |
| 4 <sub>2,3</sub> – 3 <sub>2,2</sub>   | 20117.206      | 0.002         | 20117.2044           | 0.0006        | 0.0016                    | A |
| 4 <sub>2,2</sub> – 3 <sub>2,1</sub>   | 20130.481      | 0.002         | 20130.4822           | 0.0006        | -0.0012                   | A |
| 4 <sub>1,3</sub> – 3 <sub>1,2</sub>   | 20521.046      | 0.002         | 20521.0456           | 0.0008        | 0.0004                    | A |
| 5 <sub>1,5</sub> – 4 <sub>1,4</sub>   | 24629.906      | 0.002         | 24629.9066           | 0.0007        | -0.0006                   | A |
| 5 <sub>2,4</sub> – 4 <sub>2,3</sub>   | 25144.638      | 0.002         | 25144.6375           | 0.0007        | 0.0005                    | A |
| 7 <sub>1,7</sub> – 6 <sub>1,6</sub>   | 34472.262      | 0.010         | 34472.2569           | 0.0013        | 0.0051                    | B |
| 7 <sub>0,7</sub> – 6 <sub>0,6</sub>   | 35126.923      | 0.010         | 35126.9230           | 0.0020        | 0.0000                    | B |
| 7 <sub>2,6</sub> – 6 <sub>2,5</sub>   | 35195.532      | 0.010         | 35195.5240           | 0.0011        | 0.0080                    | B |
| 7 <sub>3,5</sub> – 6 <sub>3,4</sub>   | 35222.531      | 0.010         | 35222.5236           | 0.0025        | 0.0074                    | B |
| 7 <sub>3,4</sub> – 6 <sub>3,3</sub>   | 35223.195      | 0.010         | 35223.2044           | 0.0024        | -0.0094                   | B |
| 7 <sub>2,5</sub> – 6 <sub>2,4</sub>   | 35269.664      | 0.010         | 35269.6575           | 0.0024        | 0.0065                    | B |
| 7 <sub>1,6</sub> – 6 <sub>1,5</sub>   | 35897.418      | 0.010         | 35897.4116           | 0.0019        | 0.0064                    | B |
| 8 <sub>1,8</sub> – 7 <sub>1,7</sub>   | 39390.116      | 0.010         | 39390.1081           | 0.0021        | 0.0079                    | B |
| 8 <sub>0,8</sub> – 7 <sub>0,7</sub>   | 40118.252      | 0.010         | 40118.2535           | 0.0030        | -0.0015                   | B |
| 8 <sub>2,7</sub> – 7 <sub>2,6</sub>   | 40218.511      | 0.020         | 40218.4833           | 0.0016        | 0.0277                    | B |
| 8 <sub>2,6</sub> – 7 <sub>2,5</sub>   | 40329.448      | 0.010         | 40329.4495           | 0.0038        | -0.0015                   | B |
| 8 <sub>1,7</sub> – 7 <sub>1,6</sub>   | 41018.002      | 0.010         | 41017.9994           | 0.0029        | 0.0026                    | B |
| 9 <sub>1,9</sub> – 8 <sub>1,8</sub>   | 44305.369      | 0.010         | 44305.3697           | 0.0031        | -0.0007                   | B |
| 9 <sub>0,9</sub> – 8 <sub>0,8</sub>   | 45099.094      | 0.020         | 45099.0983           | 0.0044        | -0.0043                   | B |
| 9 <sub>2,8</sub> – 8 <sub>2,7</sub>   | 45239.452      | 0.010         | 45239.4588           | 0.0023        | -0.0068                   | B |
| 9 <sub>3,6</sub> – 8 <sub>3,5</sub>   | 45294.382      | 0.020         | 45294.4077           | 0.0034        | -0.0257                   | B |
| 9 <sub>2,7</sub> – 8 <sub>2,6</sub>   | 45397.522      | 0.020         | 45397.5168           | 0.0055        | 0.0052                    | B |
| 9 <sub>1,8</sub> – 8 <sub>1,7</sub>   | 46135.431      | 0.010         | 46135.4358           | 0.0043        | -0.0048                   | B |
| 10 <sub>1,10</sub> – 9 <sub>1,9</sub> | 49217.784      | 0.010         | 49217.7869           | 0.0045        | -0.0029                   | B |

**Notes.**<sup>(A)</sup> Observed frequencies in the laboratory are from McCarthy et al. (2020).<sup>(B)</sup> Frequencies observed in TMC-1 adopting a  $v_{LSR}$  of 5.83 km s<sup>-1</sup>.<sup>(b)</sup> Observed minus calculated frequencies in MHz.
